# Supplementary material for: Unveiling water quality and health risks from groundwater chemicals in Poyang Lake basin of China: a sophisticated analysis
Source: PeerJ journal article supplement (doi:10.7717/peerj.19937), 2025-10-08
Supplement: rawdata.xlsx [file rawdata.xlsx]

## Sheet: Sheet1
Longtitude	Latitude	Na+	K+	F-	NO3-	SO42-	Mn	COD	NH4+	TDS	TH	pH	Fe3+	Al3+	Cl-	HCO3-	Ca2+	Mg2+
117.017	28.8686	4.4447	3.2971	0.408	12.823	1.807	0.025	0.07465	0.01	109.049	72.8783	6.91	0.02	0.005	15.39	54.26	12.8143	9.9274
117.032	29.2253	5.2429	0.8566	0.413	5.848	3.101	0.025	0.08774	0.136	76.4697	31.5814	6.11	1.26	0.144939	10.099	24.12	6.2903	3.8549
116.212	27.908	1.5635	0.3107	0.42	6.92	4.932	0.025	0	0.112	118.331	93.084	3.15	0.104	0.005	10.092	78.37	15.618	13.134
117.154	29.2503	4.1726	0.1939	0.421	9.695	9.887	0.0326001	0	0.052	73.9026	42.9518	5.77	0.076	0.0131114	9.353	21.1	8.8504	5.0637
117.185	29.2686	17.0598	2.2679	0.422	22.007	6.327	0.025	0.03157	0.08	100.649	29.4801	5.77	0.12	0.0209513	20.139	12.06	8.448	2.0363
115.371	27.7642	4.1812	2.1453	0.423	15.458	12.34	0.025	0.33739	0.292	105.689	61.275	5.94	0.152	0.154952	13.899	30.14	10.1591	8.7197
117.097	29.205	6.823	0.8786	0.423	5.049	8.804	0.025	0.03803	0.052	108.368	52.6587	6.31	0.02	0.005	17.909	30.14	11.1256	6.0413
115.799	28.3983	3.6915	0.1384	0.423	4.556	9.009	0.025	1.19062	0.288	51.3228	18.5506	6.92	0.12	0.335899	1.789	15.07	5.8636	0.9493
116.983	28.8931	14.9973	27.2834	0.424	33.633	45.442	0.025	0.06661	0.08	299.78	168.637	7.08	0.02	0.005	21.842	132.63	39.6616	16.9018
116.542	29.2672	1.1289	0.1309	0.425	4.248	1.803	0.025	0.37904	0.044	63.7389	29.2035	6.12	0.084	0.005	6.172	21.1	6.093	3.3971
116.271	28.6419	0.6214	0.2438	0.425	7.64	0.406	0.0862806	0.02873	0.144	32.6605	15.5083	4.88	0.02	0.0340811	3.73	6.03	2.432	2.2913
115.009	26.8902	3.934	2.8344	0.429	4.353	0.939	0.025	3.09403	0.324	91.4111	51.3899	6.07	0.056	0.0929027	11.341	48.23	15.5457	3.053
117.197	29.3439	7.8289	0.125	0.429	8.176	28.271	0.0533561	0	0.46	93.7013	40.5327	5.69	0.556	0.0684053	8.272	18.09	8.1359	4.9095
113.759	27.6386	2.5527	0.1711	0.429	4.182	22.048	0.025	0.34188	0.052	266.013	228.421	7.3	0.02	0.0108295	5.107	262.25	73.7148	10.771
115.785	27.5859	1.7626	1.9038	0.43	0.773	2.262	0.891581	0.104	0.052	129.232	101.757	6.2	1.496	0.261698	43.281	54.26	24.5502	9.8239
117.119	28.9489	22.4313	2.469	0.43	19.745	41.484	0.025	0.08791	0.01	217.877	111.259	6.29	0.256	0.147314	36.27	48.23	22.7915	13.1977
116.184	28.5236	1.3475	0.6481	0.43	3.29	2.43	0.025	2.7226	1.4	33.8239	15.2235	5.84	0.02	0.0121233	2.331	12.06	2.6331	2.1002
117.058	27.7838	1.8608	2.6765	0.431	6.565	0.369	0.181683	0	0.104	66.4329	27.4454	5.76	0.436	0.221736	11.482	12.06	4.0567	4.2049
114.916	25.9587	0.4089	0.5293	0.432	1.389	0.691	0.025	0.09504	0.028	25.3752	9.46781	5.09	0.02	0.0473649	1.321	9.04	2.9186	0.5294
117.296	28.8742	1.0719	0.2533	0.432	9.549	11.385	0.025	0	0.216	102.595	56.5275	6.54	0.488	0.180583	9.178	30.14	9.4218	8.0139
114.624	29.1142	5.6364	2.6526	0.432	3.24	8.322	0.139969	0	0.096	79.9259	45.7978	6.05	0.084	0.005	9.636	48.23	9.2078	5.5381
114.766	26.4797	12.6047	5.1177	0.433	10.559	1.54	0.578496	0.78753	0.32	95.3055	29.3178	5.49	0.436	0.257236	21.573	21.1	3.7412	4.8509
117.194	29.3394	9.2534	8.8007	0.433	8.416	17.326	0.025	0.10492	0.01	126.229	53.4255	7.22	0.56	0.121251	9.103	48.23	10.5187	6.5955
117.172	28.9614	16.1524	17.5872	0.434	40.536	34.184	0.305511	0.57104	0.34	272.503	147.34	6.86	0.052	0.0458046	33.257	120.58	47.2371	7.1368
116.721	28.9678	13.3652	0.8954	0.434	1.178	4.924	0.467061	0.68979	0.252	92.8149	25.0094	6.92	0.02	0.005	21.856	24.12	3.8236	3.7547
115.567	27.2927	18.9967	6.1592	0.435	8.861	8.48	0.454345	0.31726	0.324	151.225	63.7492	5.79	0.852	0.188779	43.618	39.19	9.3441	9.8147
115.413	27.9125	5.6777	4.4369	0.435	10.456	22.109	0.025	0.11632	0.296	130.945	74.3315	6.16	0.02	0.0155017	20.666	42.2	12.0751	10.7285
115.791	29.11	14.2243	0.8249	0.435	17.174	1.209	0.0541129	0.22745	0.208	122.842	50.0338	7.17	0.02	0.0180462	27.218	42.2	9.1901	6.5775
116.568	29.2914	9.2966	5.0916	0.436	17.162	4.048	0.203115	0.42556	0.132	95.2471	37.6339	6.35	0.084	0.0255154	20.307	21.1	5.3578	5.8901
115.58	28.0886	8.2683	0.0187	0.436	5.025	6.02	0.025	0	0.068	163.531	127.096	7.04	0.08	0.0326583	53.004	66.32	29.8727	12.7499
117.005	28.8825	6.7712	0.3482	0.437	5.052	5.967	0.025	0.03632	0.044	106.236	74.9274	6.63	0.02	0.005	22.143	48.23	12.9853	10.3213
116.347	28.695	10.6868	19.9298	0.437	13.349	33.362	0.025	0.0775	0.1	167.857	78.3681	6	0.02	0.005	19.474	66.32	14.8466	10.0282
116.727	27.8891	10.5126	3.6921	0.438	2.976	3.604	0.31071	1.18617	0.18	142.462	50.3229	6.49	0.228	0.0659968	6.121	75.36	10.2286	6.018
117.636	28.9146	6.5446	0.4425	0.439	10.442	2.744	0.025	0.44879	0.204	73.4554	30.0789	6.13	0.264	0.0817721	5.61	30.14	5.3426	4.0647
114.297	26.7484	6.2747	1.2433	0.44	20.21	13.095	0.025	0.14921	0.048	114.603	73.0047	6.89	0.392	0.167574	10.86	60.29	10.9522	11.0872
115.901	28.5889	15.8113	3.8573	0.44	15.64	72.796	0.025	0.09496	0.14	217.041	121.979	6.51	0.02	0.005	16.271	72.35	18.7932	18.2255
117.299	29.3272	10.7103	3.7834	0.441	1.857	26.219	0.153654	0.13175	0.08	151.211	92.9591	7.2	0.34	0.196905	14.368	102.49	17.4197	12.0112
116.82	28.0125	4.0799	3.8255	0.442	8.542	6.276	2.0166	0.55509	0.676	109.879	49.0923	6.2	2.88	0.446588	15.887	39.19	12.5438	4.3153
114.943	26.1808	0.4207	2.2904	0.442	0.739	2.477	0.025	1.55289	0.01	57.8161	14.1733	5.69	0.02	0.0149655	1.84	15.07	3.552	1.288
116.404	27.9739	3.4251	2.2408	0.443	3.457	9.086	0.025	0.10401	0.1	169.751	136.144	6.31	0.02	0.005	14.28	144.69	28.2841	15.9104
117.443	28.8041	21.782	17.7703	0.444	21.014	55.577	0.025	0.44354	0.236	218.896	92.4313	6.57	0.228	0.121833	24.654	57.27	24.9908	7.2922
117.574	29.0291	3.646	0.6287	0.444	4.691	0.988	0.025	0.24056	0.164	71.0258	36.191	6.53	0.02	0.015847	5.396	42.2	8.5043	3.6318
115.763	28.1303	2.7243	1.0992	0.444	2.75	7.465	0.025	0	0.92	125.979	91.632	7.15	0.02	0.016421	10.826	96.46	20.9462	9.5506
117.296	29.3178	1.4701	0.7972	0.445	1.557	8.562	0.025	0.06378	0.01	80.7186	63.9484	6.87	0.136	0.486957	4.008	60.29	12.431	7.9913
115.632	28.0572	23.6362	16.9547	0.445	32.801	56.838	0.025	0	0.1	263.793	121.199	6.41	0.056	0.0374184	50.754	54.26	19.1827	17.7998
116.193	28.1736	3.2245	0.872	0.446	3.678	7.514	0.025	0.03544	0.148	129.292	94.3204	6.75	0.02	0.005	18.771	90.43	23.6227	8.5805
117.14	29.2675	25.7428	2.4983	0.446	23.004	17.462	1.31603	1.13026	2.88	144.249	39.9855	5.94	0.496	0.0399348	34.356	30.14	9.3044	4.0681
117.101	28.9833	3.3724	0.6316	0.446	1.627	28.121	0.176075	0.33073	0.192	113.752	80.3048	6.83	0.02	0.0103388	11.237	60.29	21.2756	6.6002
116.793	28.4794	12.4569	6.2584	0.446	11.92	14.072	0.025	2.01402	0.18	128.737	50.9333	6.18	0.072	0.0167055	23.165	30.14	8.1185	7.4457
116.137	28.6228	4.5122	1.5832	0.447	4.557	2.359	0.025	0.02113	0.084	65.1765	23.9788	5.85	0.16	0.005	2.965	30.14	3.933	3.4381
115.548	28.1097	1.4158	3.1001	0.447	5.218	27.484	0.025	0	0.168	117.062	77.3246	6.82	0.228	0.0523358	5.157	54.26	18.0805	7.8139
117.167	29.0975	3.0109	0.3994	0.448	0.369	19.63	0.30963	0.92549	0.084	298.047	268.784	7.61	0.38	0.85976	1.984	331.58	60.0068	28.8846
115.765	28.1506	14.5115	2.4068	0.448	5.837	37.199	0.025	0	0.104	209.3	139.846	6.96	0.02	0.005	26.862	114.55	34.6525	12.9478
114.372	27.3602	1.2522	1.1808	0.45	2.99	4.63	0.025	0.16403	0.384	222.65	222.813	7.92	0.192	0.0446187	8.098	241.15	40.5216	29.5363
115.922	26.281	13.388	17.1717	0.452	14.4	19.33	0.025	0.28205	0.084	173.778	79.9508	7.92	0.96	0.139377	18.108	84.4	16.8712	9.1849
114.974	27.0631	8.5811	5.3841	0.452	3.489	8.579	0.226645	0.14688	0.4	110.717	64.2806	6.27	1.164	1.07538	18.943	54.26	9.9844	9.5555
115.451	28.7231	8.1575	2.4844	0.452	10.122	10.002	0.025	0.06272	0.08	157.61	104.043	6.48	0.22	0.0768501	33.129	78.37	23.5267	10.9996
117.523	28.9459	3.2665	0.6622	0.453	7.668	1.696	0.025	0.46471	0.236	67.8058	31.0132	6.7	0.22	0.17064	4.896	30.14	5.2154	4.3687
114.921	27.254	13.7125	2.1824	0.454	20.779	6.206	0.025	0.95144	0.328	152.445	74.2577	6.68	0.088	0.015866	22.815	72.35	22.7385	4.2447
116.296	28.3725	1.179	0.9521	0.454	2.05	1.124	0.025	0	0.1	51.844	32.5917	6.1	0.12	0.005	1.561	36.17	9.4108	2.2081
114.959	28.2288	8.1677	0.4994	0.455	3.202	72.999	0.025	0	0.088	299.491	238.917	7	0.212	0.176107	14.658	192.92	59.5788	21.8915
115.332	27.6174	5.006	3.3239	0.456	7.995	15.264	0.025	0.53107	0.28	204.123	158.782	7.25	0.104	0.0885411	11.51	156.75	35.2945	17.1568
115.904	28.6675	11.231	5.078	0.456	73.891	9.546	0.025	0.17835	0.52	172.924	68.545	5.6	0.2	0.0613762	13.401	18.09	10.1385	10.4976
115.126	28.1656	2.206	2.0973	0.456	2.683	4.304	0.025	0.28589	1.148	150.192	138.858	7.94	1.312	0.0232553	5.814	159.76	35.0073	12.4927
115.34	27.2286	11.4283	1.7989	0.457	4.188	16.043	0.0974846	0.28932	0.356	223.043	154.921	6.3	0.444	0.116402	69.059	84.4	33.0735	17.566
117.132	28.9403	19.5532	25.1974	0.457	34.091	55.19	0.025	0.06896	0.084	269.632	133.068	7.11	0.02	0.0179546	25.104	96.46	26.1862	16.4353
114.61	26.8918	3.479	3.6638	0.458	4.797	6.973	0.0707094	0.22789	0.01	125.886	86.9223	6.39	0.264	0.0231238	24.813	63.3	21.6148	8.0015
114.389	27.7736	14.7488	0.1976	0.458	14.179	16.493	0.025	1.01845	0.088	354.592	321.453	7.49	0.112	0.148718	18.644	343.64	70.1529	35.5225
115.458	28.4247	4.7042	10.2259	0.458	20.768	46.999	0.072065	0.16788	0.06	206.717	137.052	6.61	0.048	0.0181013	16.474	78.37	41.9833	7.824
114.553	26.6398	6.673	0.8197	0.459	0.554	13.979	1.71494	2.2748	0.356	126.858	83.0989	6.35	1.052	0.156699	18.171	69.33	6.4782	16.2513
115.825	28.3817	19.0135	5.2308	0.459	22.761	51.446	0.025	2.12198	0.332	218.346	108.344	6.76	0.096	0.26369	16.024	72.35	25.5041	10.8451
115.532	28.0203	22.0755	11.6398	0.459	16.92	59.998	0.025	0	0.164	294.393	171.765	6.77	0.252	0.0518987	63.232	96.46	34.793	20.6136
116.411	27.9917	3.7125	6.661	0.46	9.99	9.213	0.025	0	0.104	127.961	75.8127	6.84	0.02	0.005	17.556	63.3	15.7003	8.89
113.746	27.6336	13.3261	3.4842	0.46	0.232	2.443	0.025	0.40083	0.12	171.326	131.417	8.19	0.428	0.0548978	17.286	159.76	24.0368	17.3377
115.881	28.7567	1.3721	0.6353	0.462	0.772	0.393	0.025	0.02742	0.076	42.0605	12.7125	6.16	0.02	0.005	0.782	18.09	2.0629	1.8362
116.858	28.8531	4.8043	3.7149	0.462	6.519	0.86	0.025	0.60972	0.14	58.7102	19.412	6.13	0.02	0.0116721	9.668	18.09	5.8202	1.1848
114.969	27.1017	14.1366	4.3051	0.463	10.768	17.625	0.145975	0.1805	0.036	129.923	64.2315	5.94	0.06	0.0493341	30.743	36.17	9.6428	9.7507
115.264	27.2196	13.1901	2.9074	0.463	16.101	10.142	0.326871	2.35818	0.636	100.814	35.6932	5.86	0.02	0.0206714	18.376	24.12	6.0914	4.974
115.368	27.7775	4.8839	8.5262	0.464	23.337	0.451	0.780713	0.05585	0.308	80.2089	18.7051	5.01	0.216	0.128002	14.366	6.03	3.0727	2.6791
114.865	25.7567	8.2047	1.9734	0.465	3.308	18.535	0.025	0.27618	0.144	76.0418	33.5917	6.43	1.42	0.0566354	14.713	12.06	10.15	2.0027
114.4	26.8771	0.6371	1.0147	0.465	0.514	2.182	0.447729	0.19559	0.032	57.1914	38.407	6.91	1.088	0.257622	1.695	42.2	6.0182	5.6774
115.967	28.5367	10.0666	3.6535	0.465	16.965	6.701	0.025	0.11966	0.44	113.012	48.0614	5.66	0.02	0.005	14.683	36.17	10.6754	5.1979
116.151	28.6942	7.1458	1.9809	0.465	0.465	6.503	1.25228	0.26764	0.16	81.0343	28.8349	6.22	0.02	0.005	5.619	45.22	5.0692	3.9284
116.819	28.4831	3.9184	2.579	0.465	1.038	8.615	0.247072	0.83393	0.132	83.6473	50.7851	5.87	0.02	0.0086762	16.195	36.17	17.7916	1.5443
116.128	28.5361	7.3628	2.3298	0.466	4.836	4.177	0.025	0.03557	0.064	76.7983	30.5582	6.13	0.02	0.005	3.148	42.2	4.1207	4.922
116.111	28.6411	5.7117	2.5114	0.466	1.217	1.295	0.025	0.03506	0.08	87.1757	42.6991	6.06	0.12	0.005	3.96	63.3	6.9803	6.1363
115.576	28.8367	1.5835	5.7566	0.466	10.279	18.119	0.025	0.11011	0.068	113.111	63.3566	6.31	0.02	0.0047958	7.179	48.23	14.9676	6.3095
115.822	29.4297	4.2357	2.8432	0.467	3.919	12.839	0.025	0.1922	0.072	99.6886	52.6484	7.16	0.02	0.0125535	4.544	57.27	10.6716	6.3141
117.075	28.745	6.8916	2.1002	0.467	6.211	16.794	0.025	1.90291	0.344	225.771	195.333	7.38	0.072	0.0407787	13.409	183.88	41.1335	22.4921
115.445	28.4425	5.053	5.6404	0.467	5.121	27.151	6.18721	0.59371	1.48	163.58	100.524	6.7	0.156	0.045798	18.541	96.46	31.3131	5.4238
114.954	27.075	9.4917	4.7644	0.469	14.284	34.009	0.025	0.46159	0.044	179.495	117.638	7.33	0.076	0.0106721	14.376	96.46	23.0596	14.5843
117.222	29.2708	8.6719	3.406	0.47	0.897	9.263	1.26281	0.3827	0.428	145.845	90.2627	6.91	0.02	0.005	5.145	120.58	21.1533	9.0925
115.596	28.085	6.9754	0.2118	0.47	3.856	9.41	0.025	0	0.216	164.984	124.268	7.08	0.048	0.005	29.139	108.52	26.321	14.2168
116.102	29.0339	15.0975	2.4016	0.471	24.371	1.6	0.025	0.21364	0.01	130.023	43.5401	5.86	0.02	0.005	21.779	30.14	7.0628	6.2905
117.409	28.4023	5.1783	1.9238	0.472	3.438	6.812	0.025	1.97339	0.28	152.056	112.738	6.58	0.724	0.0068258	48.84	48.23	20.0232	15.2355
115.876	28.3858	9.0466	5.3888	0.473	14.188	21.006	0.025	0	0.01	113.881	44.7013	5.7	0.02	0.005	9.35	36.17	6.6277	6.8363
115.647	28.8967	1.0527	1.2482	0.473	0.919	9.414	0.025	0.31629	0.244	79.9	53.0655	6.73	0.02	0.0137487	12.468	39.19	13.1615	4.9056
117.974	28.4411	3.2286	1.66	0.473	2.445	0.336	0.0892422	0.11649	0.032	44.8232	19.3502	5.91	0.152	0.0284282	8.802	12.06	5.898	1.1226
116.199	27.9099	4.9585	1.5837	0.474	9.969	15.736	0.025	0.22562	0.16	128.406	80.737	6.45	0.132	0.0671142	30.709	24.12	16.325	9.707
116.185	27.8587	5.9251	6.9664	0.474	6.056	15.007	0.025	0	0.144	244.347	192.217	6.66	0.188	0.0479152	17.611	229.09	32.6026	26.9083
117.171	29.2728	2.9332	0.2738	0.474	14.853	2.24	0.0926247	0.3811	0.12	268.5	228.206	7.74	0.284	0.0575149	13.146	262.25	84.5041	4.1767
117.244	29.2956	4.6959	3.4428	0.475	2.424	22.456	0.025	0.2215	0.01	89.8542	51.8173	6.29	0.02	0.005	5.321	42.2	15.03	3.4695
115.936	28.5406	10.1077	3.7979	0.475	15.705	39.792	0.025	0.15684	0.32	169.626	113.365	6.21	0.02	0.005	13.824	66.32	20.5155	15.0892
115.649	29.4731	0.9473	0.5411	0.476	3.737	9.762	0.025	0.65136	0.132	312.812	292.837	7.86	0.02	0.0212116	2.35	349.67	56.4475	36.8838
117.522	28.3227	5.9363	2.6357	0.476	15.677	0.903	0.0552005	0.21119	0.01	67.5384	30.2443	6.13	0.02	0.0476251	14.225	9.04	4.7673	4.4537
114.105	25.6872	2.4604	0.8832	0.477	5.305	5.67	0.025	0.26114	0.084	70.5208	40.3271	6.8	0.1	0.005	3.664	39.19	8.722	4.5042
115.713	28.9403	20.5586	0.9035	0.478	3.23	20.824	0.025	0.03266	0.084	164.958	84.0515	6.91	0.02	0.0520854	29.798	78.37	15.2438	11.1675
113.748	27.6403	2.3386	0.3892	0.478	9.747	4.854	0.025	0.17582	0.01	56.1155	32.2972	6.16	0.12	0.005	5.421	18.09	5.9033	4.2634
116.018	26.4715	8.5317	6.0163	0.48	14.229	3.735	0.0872313	0.06867	0.032	94.9343	35.4645	6.04	0.52	0.0078985	15.582	30.14	8.2061	3.6362
117.3	28.8636	5.2957	0.6567	0.48	3.125	2.482	0.0376891	2.83615	0.064	141.545	82.2319	7.74	0.44	0.107562	6.343	108.52	18.7848	8.5785
114.902	27.0331	4.7229	0.9526	0.481	9.389	1.602	0.273715	0.36354	0.14	49.3503	16.6927	4.31	0.02	0.41238	9.095	6.03	4.022	1.6148
115.977	28.6592	19.2438	2.8645	0.483	11.686	37.123	0.025	0.16306	0.36	154.098	71.1895	5.79	0.02	0.005	18.273	42.2	18.5884	6.0161
116.473	28.1203	3.4618	3.3501	0.484	1.849	6.777	0.338132	0.16858	0.048	118.782	62.6902	6.04	0.196	0.0124394	26.925	39.19	14.3608	6.5156
115.079	26.9915	13.1513	2.4261	0.484	1.992	85.272	0.0638176	0.14354	0.064	235.882	145.295	6.59	0.3	0.161718	17.538	84.4	26.664	19.1149
113.729	27.6397	16.5112	5.544	0.484	9.074	130.616	0.126278	0.16151	0.128	388.84	263.686	6.82	0.02	0.0004973	15.32	189.91	75.5388	18.2287
115.447	28.1494	0.7617	1.1312	0.484	1.075	4.277	0.282855	2.02746	0.228	195.04	175.117	8.03	1.184	0.0408258	6.464	204.98	52.9832	10.3978
117.123	28.9608	7.1736	8.2296	0.485	2.149	32.687	1.22084	1.2088	0.964	165.639	76.3267	7.24	0.604	0.0665664	8.92	75.36	18.139	7.5361
113.831	27.8953	12.8461	1.079	0.485	9.077	28.205	0.025	0.54642	0.052	248.209	199.211	7.35	0.044	0.0122577	18.262	204.98	39.4623	24.4471
113.783	27.8915	2.8848	0.3103	0.485	0.6	111.663	0.155817	0.14105	0.192	464.644	424.304	7.71	0.044	0.0132521	7.989	385.84	79.88	54.6001
116.249	27.9392	3.9892	0.998	0.486	11.63	9.355	0.025	0.08817	0.128	124.383	82.3056	6.33	0.02	0.0186443	35.482	36.17	15.4668	10.6083
115.977	28.3928	3.6437	2.4242	0.486	5.356	1.069	0.025	0.2406	0.04	61.368	11.3492	5.61	0.02	0.005	2.324	18.09	2.5	1.2401
113.725	27.6378	15.2584	6.8846	0.486	10.234	66.345	0.025	0.26808	0.076	365.769	254.824	6.95	0.332	0.0008048	9.21	289.38	74.1816	16.8996
117.041	28.2686	4.2597	0.4031	0.486	16.588	23.637	0.025	0	0.01	116.964	75.6476	5.93	0.02	0.10728	10.213	41.49	12.0375	11.0709
117.142	28.3075	2.3162	1.0746	0.486	6.186	5.262	0.025	0	0.01	85.7159	59.3099	5.98	0.02	0.0106971	10.654	41.49	15.043	5.2811
116.879	28.4211	8.3025	1.7002	0.487	3.152	0.665	0.025	0	0.01	81.9012	26.1584	5.71	0.02	0.005	9.796	35.56	7.3222	1.9123
117.674	28.9443	10.1811	4.177	0.488	4.168	7.369	0.253166	0	0.1	107.975	47.4233	7.5	1.676	0.0396757	7.758	72.35	8.6638	6.2627
115.779	28.6444	8.4707	1.0839	0.489	7.749	2.02	0.025	0.0326	0.14	179.184	114.133	7.78	0.02	0.005	22.316	120.58	28.8331	10.2323
114.938	25.8503	13.8219	3.0342	0.49	4.039	30.976	0.100706	1.43915	0.856	117.891	50.1015	6.7	0.152	0.005	19.862	24.12	16.8201	1.9674
115.053	28.231	6.065	1.3999	0.49	5.455	8.426	0.025	0.42777	0.032	314.564	271.819	7.04	0.284	0.15631	34.706	283.35	83.8931	15.1378
116.462	28.1436	3.9862	9.784	0.491	13.772	0.24	0.213124	0	0.064	73.9341	26.2076	4.98	0.168	0.101768	18.97	6.03	3.5559	4.208
116.166	28.2219	10.0419	2.9003	0.491	3.784	10.843	0.025	0.17834	0.01	132.912	83.0601	6.31	0.02	0.0230641	11.12	90.43	16.5309	10.1463
116.06	29.0222	4.1359	1.3203	0.492	8.159	0.739	0.025	0.1812	0.01	62.9193	15.9052	5.8	0.02	0.005	2.501	18.09	2.4	2.4071
114.84	28.2868	3.7984	0.7805	0.493	1.479	4.833	0.025	0.20769	0.04	156.564	123.698	6.36	0.12	0.0558327	27.068	114.55	28.5723	12.7131
114.747	25.0898	10.981	6.2523	0.494	32.473	3.377	0.3588	1.71643	0.06	108.042	32.5065	5.52	0.144	0.108293	13.549	12.06	8.1055	2.9789
116.175	28.2286	13.4526	6.3569	0.494	7.513	31.061	0.025	0.25715	0.04	177.49	112.28	6.31	0.02	0.005	16.407	90.43	29.2779	9.5127
115.906	28.3656	9.3024	4.0493	0.494	22.743	3.024	0.025	0.18151	0.01	109.565	37.9429	5.83	0.02	0.005	13.365	30.14	6.7658	5.1114
114.924	25.8547	17.26	4.3906	0.495	14.892	4.889	0.199985	0.219	0.06	95.4396	18.023	5.38	0.2	0.298222	23.515	12.06	0.1	4.316
115.933	28.5628	7.8636	2.6013	0.495	2.936	21.769	0.025	0.2062	0.36	111.818	63.4651	6.21	0.02	0.0469261	10.273	48.23	15.4301	6.0554
113.733	27.6453	4.0976	4.523	0.495	3.095	15.314	0.0043668	0	0.096	148.43	112.996	7.04	0.02	0.0006446	7.386	108.52	27.5376	10.7417
116.912	28.3814	5.3047	1.198	0.495	9.88	18.454	0.0114222	0	0.01	124.541	64.6902	5.77	0.112	0.0379091	8.332	53.35	18.1318	4.7147
116.417	27.99	5.3825	1.4956	0.497	7.673	6.414	0.0738052	0.22673	0.168	122.238	79.7943	6.76	0.156	0.0309055	17.122	78.37	18.3017	8.2795
116.281	26.2101	5.1915	4.3827	0.497	2.645	18.94	0.477794	0.19509	0.176	170.454	109.335	7.4	0.176	0.0338414	8.334	126.6	29.3297	8.766
114.929	27.01	1.3284	0.5356	0.497	2.12	4.822	0.0822162	0.25046	0.044	234.234	214.571	7.39	0.504	0.0298293	11.033	241.15	64.1528	13.2059
114.935	27.0778	17.9353	8.9932	0.497	41.721	9.011	0.502312	0.17733	0.496	143.15	51.4083	5.5	0.136	0.537172	30.674	12.06	6.5377	8.5196
115.764	28.9592	29.0303	3.4136	0.497	5.659	48.187	0.801195	0.70809	1.344	305.99	166.867	7.41	0.02	0.0107093	43.406	174.83	34.6632	19.5029
114.616	26.415	12.7289	2.8842	0.498	3.414	19.031	0.924237	2.39185	0.312	285.17	226.532	6.66	0.08	0.0612579	81.805	141.68	42.5645	29.2006
115.446	27.9103	13.5173	3.6567	0.498	1.631	19.678	0.025	0.34513	0.328	118.326	51.9665	6.77	0.284	0.132162	19.077	51.24	16.5102	2.6082
114.895	27.0231	1.4545	0.2861	0.498	5.823	0.309	0.025	0	0.01	99.7921	79.6298	7.54	0.06	0.0288421	7.732	82.98	28.4894	2.0621
117.263	29.3081	29.2604	10.0265	0.498	3.507	35.026	5.91415	0.67537	1.52	240.765	105.898	6.27	0.08	0.0679233	32.773	156.75	30.6451	7.1338
117.156	28.3053	3.0726	0.6998	0.498	4.615	16.677	0.025	0	0.01	93.7845	52.6438	5.64	0.02	0.0120025	6.865	29.64	12.563	5.1661
115.637	28.2361	3.0249	0.1837	0.499	2.073	1.327	0.025	1.08391	0.288	49.9249	27.6562	7.02	0.4	0.176703	1.671	36.17	6.7813	2.604
116.579	28.2272	0.8723	2.1725	0.5	3.458	1.614	0.025	0.04701	0.088	83.0055	55.7906	6.48	0.588	0.0711104	4.032	66.32	16.6161	3.4726
115.98	28.6572	18.0791	5.7116	0.5	5.289	53.887	0.025	0.26003	0.36	201.516	108.148	6.2	0.88	0.0442579	30.034	60.29	18.2088	15.2211
116.019	28.5803	1.5738	1.8835	0.501	1.778	2.624	0.0667889	0.17316	0.28	53.2118	16.1586	5.69	0.1	0.0551865	2.119	18.09	2.956	2.1315
115.91	28.6294	28.4316	5.0085	0.501	2.417	43.288	0.025	0.06115	0.156	281.446	170.11	7.074	0.02	0.005	28.187	192.92	38.0871	18.2142
114.439	27.7975	10.9802	1.5361	0.501	4.956	17.791	0.242354	0.3262	0.01	172.012	109.613	6.95	0.02	0.104121	16.109	120.58	32.371	6.9895
116.098	25.92	6.7595	0.8003	0.502	3.933	10.176	0.201093	1.95781	0.212	183.589	144.684	8.23	0.588	0.132808	9.238	162.78	43.1546	8.9672
114.62	26.3978	215.137	8.2231	0.502	4.452	228.147	0.813114	0.61014	0.636	1635.21	905.782	6.27	0.332	0.0904729	748.839	141.68	285.105	47.0798
114.358	27.775	18.5639	0.1767	0.503	14.093	16.686	0.025	2.06737	0.212	350.612	293.425	7.44	0.128	0.022577	19.201	337.61	68.2682	29.859
115.852	29.2464	8.011	0.3843	0.504	2.531	13.529	0.859958	0.6801	0.38	324.132	272.919	7.68	0.208	0.005	39.22	277.32	80.6739	17.3571
115.05	27.1011	1.6276	2.655	0.505	3.292	4.655	0.025	0	0.01	194.278	175.727	7.84	0.13	0.0218104	6.22	207.46	43.8804	16.0654
113.783	27.5629	4.0767	1.195	0.506	5.387	19.117	0.025	0.28614	0.128	299.778	285.752	7.88	0.164	0.005	6.393	295.41	70.1132	26.877
116.805	28.4797	16.2376	9.8105	0.506	9.447	30.047	0.171219	1.30821	0.01	121.258	34.1912	5.35	0.056	0.151646	24.834	12.06	6.9077	4.1143
114.561	27.8095	6.932	0.9567	0.506	16.796	15.76	0.025	0.84997	0.132	233.273	184.958	7.06	0.02	0.174487	15.832	180.86	52.0824	13.3338
117.192	28.3128	1.908	0.6688	0.506	5.784	15.316	0.025	0	0.01	88.0304	53.7349	5.85	0.06	0.0584708	4.985	35.56	15.3385	3.7481
116.901	28.375	4.9756	0.6666	0.507	13.243	12.288	0.025	0	0.01	111.168	67.8265	5.98	0.02	0.0448828	13.461	47.42	16.7826	6.2944
114.889	24.6703	10.3786	1.9081	0.508	8.627	1.914	0.025	0.61227	0.01	163.039	58.8545	7.13	0.02	0.0068994	4.176	84.4	15.6519	4.8013
114.923	25.3999	10.2056	1.0548	0.508	1.526	3.572	0.180519	0.75006	0.172	197.896	138.592	8.05	0.516	0.242377	8.53	183.88	37.5185	10.9053
115.797	29.3144	2.2964	0.4015	0.508	0.742	2.794	0.025	0	0.22	188.647	158.951	8.29	0.02	0.005	0.66	180.86	49.289	8.712
116.931	28.4072	5.4304	4.3281	0.508	0.432	30.15	1.50422	2.58913	0.428	131.292	74.75	5.52	2.98	0.0295472	33.413	29.64	22.1495	4.7214
116.229	27.5644	16.4443	17.3037	0.509	9.909	134.753	0.569846	0.39234	0.368	398.44	240.154	6.55	0.264	0.005	25.706	150.72	59.3763	22.3145
115.004	27.1342	2.8298	4.5193	0.509	4.043	18.606	0.025	0.32096	0.01	104.95	55.8689	6	0.196	0.0419995	8.74	44.46	10.9413	6.9326
113.777	27.6514	7.7483	0.9332	0.509	6.08	33.475	0.025	0.18607	0.01	326.22	273.048	7.71	0.18	0.195346	14.484	295.41	82.0242	16.5696
117.912	28.5428	2.1517	0.842	0.509	3.545	19.963	0.025	0.06549	0.064	250.058	214.382	8.42	0.02	0.0052557	6.054	211.01	72.3615	8.1824
113.757	27.6458	5.1562	0.5211	0.51	3.812	22.443	0.025	0.23194	0.01	302.154	254.03	6.7	0.144	0.005	16.895	277.32	80.8481	12.6645
115.266	28.909	8.6007	0.9063	0.51	2.452	5.091	0.0625387	1.70002	0.336	93.9729	37.6103	6.86	1.3	0.0214474	9.179	51.24	8.6063	3.9146
116.372	26.9415	14.8373	19.4549	0.511	15.83	15.517	0.263197	0.4066	0.188	186.697	84.2907	6.35	0.152	0.0078935	31.32	87.42	20.7004	7.9169
114.695	27.2551	5.5321	26.9238	0.511	15.805	32.806	0.0710355	0.16533	0.396	213.801	117.379	6.76	0.308	0.658246	14.744	120.58	28.1763	11.4189
115.65	29.7336	19.6194	14.7541	0.511	6.396	45.699	0.0892737	0.90768	0.104	289.548	168.553	7.25	0.02	0.005	16.989	204.98	43.5334	14.5338
114.945	25.8578	32.0184	15.0055	0.512	44.562	65.228	0.025	0.27607	0.088	293.526	137.268	6.6	0.144	0.005	43.332	54.26	38.4638	10.0106
115.295	26.4334	11.781	4.2804	0.512	9.818	17.322	0.025	0.13716	0.036	151.656	84.862	7.44	0.052	0.017489	29.096	54.26	18.6893	9.2751
115.159	26.8569	15.5627	18.7167	0.512	29.5	28.853	0.06574	0.47537	0.288	273.678	166.936	7.25	0.78	0.515791	16.742	156.75	40.0468	16.2553
115.089	27.0029	2.0533	2.4399	0.512	0.733	12.559	0.421094	0.382	0.116	156.719	123.085	7.2	0.4	0.209817	2.508	150.72	20.5675	17.4182
116.236	28.9	18.3207	0.1353	0.512	3.15	4.154	4.34337	0.20332	0.272	118.135	21.8209	6.16	0.02	0.005	6.46	60.29	4.59	2.5157
115.903	27.6575	3.472	1.3796	0.513	7.453	10.38	0.025	0.20081	0.204	93.6876	36.0167	6.49	0.328	0.0436345	4.022	30.14	6.503	4.803
114.963	25.4579	7.4733	27.5261	0.513	10.534	12.362	1.04548	0.07882	0.312	212.47	118.319	6.63	1.188	0.0921426	14.109	162.78	28.8753	11.2233
115.988	29.705	12.7711	0.5845	0.514	6.314	26.587	0.025	0.17921	0.088	188.572	138.976	6.83	0.104	0.005	20.201	114.55	35.2743	12.3595
114.247	29.0054	13.9682	7.2784	0.514	0.616	115.253	0.208022	0.63432	0.12	341.038	223.209	8.04	0.12	0.0124127	11.027	186.89	61.7238	16.7763
114.161	28.0492	31.8173	2.9214	0.514	5.672	56.79	0.136068	3.63237	0.292	457.377	326.494	7.38	0.112	0.0189863	43.059	373.78	81.8741	29.6392
115.319	28.2617	4.6398	1.0615	0.514	0.837	2.342	2.15929	2.20668	1.208	160.277	129.12	7.76	0.564	0.0278925	3.008	180.86	42.2369	5.7442
115.334	26.259	11.0599	3.3921	0.516	3.408	3.018	0.025	0.2551	0.01	97.0179	41.0555	6.58	0.292	0.0109018	10.517	60.29	6.1583	6.2356
115.665	28.9081	3.594	5.3871	0.516	3.123	8.753	5.15927	1.49236	1.42	113.35	64.9731	6.41	0.02	0.0021194	11.266	81.39	16.5268	5.7566
116.343	28.0219	6.0535	9.6062	0.517	5.09	23.727	0.139321	0.1249	0.096	175.041	111.303	7.42	0.02	0.017793	11.765	120.58	24.3665	12.2536
114.697	29.1703	27.2968	30.108	0.518	6.651	58.563	0.217896	0	0.116	373.452	225.675	7.56	0.02	0.005	23.325	265.27	48.5658	25.3536
113.729	27.6331	13.6185	1.6528	0.518	14.487	95.795	0.946796	0.31247	11.2	385.098	285.227	7.63	0.224	0.005	14.316	253.21	79.2968	21.1808
114.414	27.7811	8.4134	1.0814	0.518	9.596	37.316	0.025	0.30701	0.052	299.446	266.249	7.2	0.12	0.272573	12.227	259.24	47.1187	36.0839
115.824	29.5706	2.5611	0.5801	0.519	2.578	5.426	0.025	0.06111	0.088	310.856	289.144	7.89	0.128	0.005	3.548	349.67	85.86	18.1524
114.406	27.7886	8.5518	1.0123	0.519	9.544	37.254	0.025	0.27873	0.01	297.668	262.327	7.22	0.02	0.0107773	12.172	259.24	48.177	34.4899
117.248	29.2942	12.3393	2.1085	0.52	7.123	24.428	0.123124	0.21732	0.12	142.379	81.3347	6.12	0.02	0.005	13.533	72.35	20.8351	7.1174
115.998	29.7133	13.0586	0.7521	0.52	2.487	15.006	0.025	0.52462	0.01	239.434	190.012	8.03	0.128	0.005	15.905	211.01	54.0766	13.3519
115.071	28.2366	5.3246	22.7592	0.52	25.664	48.961	0.025	0.14414	0.01	334.721	233.246	7.39	0.088	0.0897694	9.064	241.15	69.1699	14.6986
115.561	29.6422	1.7918	2.2812	0.521	3.801	16.624	0.025	0.0368	0.136	276.363	241.417	8.05	0.02	0.005	2.506	265.27	69.2296	16.6466
116.046	28.995	7.1271	1.5959	0.521	4.62	2.148	0.025	0.18248	0.01	83.1543	24.7112	6.03	0.02	0.005	2.931	36.17	4.1803	3.466
115.064	28.6831	4.1078	1.6736	0.522	3.496	4.232	0.025	0	0.168	99.0677	49.923	6.86	0.172	0.237809	6.642	54.26	12.987	4.2483
115.292	27.6769	15.0988	22.8657	0.524	14.729	62.531	0.025	0.22056	0.304	274.525	143.245	6.52	0.056	0.0444978	30.139	108.52	29.1354	17.1184
115.679	29.8175	12.2139	1.6488	0.524	14.109	26.244	0.205243	0.14606	0.312	288.004	212.661	8.1	0.02	0.005	16.693	235.12	64.1116	12.7669
116.476	28.1114	3.7332	16.0077	0.525	6.727	9.77	0.0222002	0	0.088	142.074	69.4078	6.37	0.168	0.0448337	30.439	57.27	11.8951	9.642
115.987	29.715	21.3278	1.4226	0.525	6.923	6.874	0.375248	0.70056	0.572	188.614	119.563	7.53	0.112	0.0213578	44.456	96.46	34.0145	8.4092
116.545	28.0539	1.8805	1.4636	0.526	4.75	0.857	0.025	0.02411	0.076	70.935	49.4235	6.91	0.648	0.177963	5.521	54.26	16.5357	1.9752
114.278	25.6073	1.2525	0.4064	0.526	2.577	13.818	0.025	0.19643	0.22	200.091	177.341	7.79	0.34	0.005	2.693	198.95	58.6081	7.527
117.585	28.9329	12.2197	3.2075	0.526	2.565	30.765	0.497499	0.70756	0.752	128.277	59.244	6.31	0.28	0.111618	9.711	60.29	14.0017	5.8965
115.492	28.8504	10.7091	2.3521	0.526	0.56	5.225	0.0569514	1.20232	0.32	136.893	76.5854	7.69	0.096	0.0964191	6.549	114.55	18.0963	7.6248
118.227	28.6623	10.8993	1.9852	0.527	8.749	184.393	0.025	0.12234	0.01	394.04	269.06	6.87	1.408	0.0608314	7.702	114.55	70.3365	22.6881
114.905	26.8042	12.7966	2.4056	0.528	1.819	27.919	0.482746	0.5	8.04	259.478	179.913	7.18	0.02	0.0102618	19.006	189.68	59.32	7.72
117.167	29.2575	15.053	2.5429	0.528	3.271	71.262	6.60404	0.25432	1.408	258.901	172.656	6.8	1.676	0.129714	23.287	138.66	33.1055	21.8533
114.466	27.6984	5.2199	0.9942	0.529	0.551	21.189	8.9155	2.41476	0.62	177.912	117.526	6.9	0.02	0.0458379	4.494	168.81	33.052	8.4981
114.894	25.8236	24.5547	11.4118	0.53	5.287	104.825	0.025	2.24126	0.392	276.94	127.593	7.8	0.356	0.005	21.884	75.36	19.904	18.9153
114.945	25.8503	6.735	3.1467	0.53	7.488	22.194	0.025	0.36764	0.01	166.233	117.824	7.6	0.144	0.0300044	9.531	105.5	43.1734	2.4332
117.146	29.3825	29.9853	14.8039	0.53	0.387	3.998	3.14685	1.60124	1.672	297.253	172.685	7.27	0.38	0.0410962	49.216	211.01	47.0397	13.4112
117.557	28.8553	21.2607	1.7074	0.53	12.308	10.294	0.193769	0.48962	0.232	162.596	83.8817	8.02	0.228	0.15328	7.46	117.56	14.2389	11.7356
114.35	25.3931	13.7263	8.2519	0.531	1.692	11.218	0.967483	0.34705	0.184	175.573	76.8986	7.09	0.292	0.005	14.544	111.53	10.9721	12.0207
116.027	25.8547	4.3304	0.7821	0.531	11.759	0.866	0.0658654	0.0592	0.052	57.8042	24.701	5.85	0.48	0.29573	10.499	12.06	3.9666	3.5931
114.168	27.7192	0.4045	1.7338	0.531	5.799	23.45	0.025	0.16044	0.22	338.743	312.636	7.61	0.02	0.0159176	4.569	361.73	88.5264	22.2403
114.664	27.6537	6.8617	11.008	0.531	13.207	71.31	4.41374	0.46069	0.82	209.476	104.524	7	0.056	0.0119371	9.634	66.32	17.4447	14.8043
115.787	28.2625	10.8103	0.2386	0.531	2.046	152.641	0.025	0	0.14	393.675	288.831	7.99	0.02	0.005	5.685	211.01	79.9411	21.6654
114.659	25.5339	1.491	1.0897	0.532	12.999	29.349	0.0192442	0.00452	0.028	114.247	71.0237	6.42	0.12	0.150174	6.593	30.14	12.092	9.915
116.117	29.3947	8.0487	0.5922	0.532	0.879	2.286	0.18747	0.39949	0.188	122.262	53.4647	7.76	0.076	0.0231651	1.978	84.4	11.5808	5.961
115.122	29.2614	8.9897	4.2357	0.532	7.409	34.168	0.320359	0.0888	0.116	235.238	194.636	7.56	0.02	0.005	9.069	192.92	36.3797	25.2054
117.859	29.1511	9.3125	7.7286	0.532	4.416	9.202	0.576857	1.84829	0.244	240.197	191.813	7.53	0.228	0.0592726	12.187	211.01	44.8754	19.3683
116.847	28.8511	13.1123	3.9057	0.533	4.24	6.401	0.117574	0.6229	0.292	113.922	52.3826	7.17	0.072	0.023548	9.268	72.35	14.3703	4.0068
117.057	27.709	11.8415	3.61	0.534	9.496	15.203	0.764338	0.51629	0.312	188.715	117.392	7.06	0.228	0.0133617	12.881	138.66	24.4973	13.6529
115.677	24.8464	19.1862	22.1178	0.534	51.161	75.034	0.115391	0.04278	0.06	242.483	46.3555	5.35	0.152	0.0505615	1.236	6.03	3.9516	8.8607
114.811	25.7986	12.9338	9.5216	0.534	13.335	26.45	0.025	1.53394	0.212	180.846	92.8208	6.71	0.02	0.0154106	16.598	87.42	21.1858	9.694
117.24	29.3078	15.461	1.7767	0.534	8.807	33.237	0.025	0.20049	0.04	303.959	214.903	7.39	0.1	0.106877	21.556	241.15	69.7741	9.8778
117.052	29.2225	27.9382	26.0621	0.534	6.239	36.191	0.267124	1.14928	0.468	279.065	143.491	7.68	0.264	0.0601281	30.948	156.75	33.1454	14.7466
115.988	28.6364	110.651	5.6236	0.534	4.783	438.795	0.140018	0.31927	0.4	756.869	277.174	5.88	0.88	0.217199	50.352	54.26	61.307	30.1337
114.823	27.7453	5.8968	1.5806	0.535	19.983	47.396	0.025	0.48724	0.056	191.044	130.129	6.65	0.224	0.0269184	12.894	69.33	30.652	13.0138
116.56	28.1956	30.113	5.2263	0.536	1.998	40.732	3.14734	2.05948	0.952	288.722	160.394	6.77	0.34	0.0297126	18.592	211.01	39.8124	14.8087
117.778	29.068	7.9992	0.5969	0.537	0.723	6.18	0.0555167	0.82684	0.284	154.109	95.4073	7.57	0.112	0.0284159	4.171	132.63	24.8618	8.0931
113.96	27.1309	3.8217	3.0901	0.538	4.861	14.283	0.025	0.19086	0.024	264.865	254.402	7.6	0.144	0.005	5.1	265.27	59.8872	25.4648
117.527	28.2837	10.7711	0.6646	0.539	9.047	16.056	0.168528	0.69059	0.01	269.991	216.267	7.53	0.348	0.254322	19.93	207.99	54.3292	19.5744
114.918	25.825	11.2667	5.0428	0.54	3.551	15.483	0.025	0.70155	0.072	134.91	69.8206	7.65	0.144	0.005	10.946	78.37	15.2227	7.7245
116.103	28.3081	10.7484	4.5822	0.54	7.534	17.488	0.025	0.23529	0.04	172.819	113.477	6.22	0.02	0.005	11.558	108.52	18.6776	16.231
116.068	28.4375	24.6607	1.8074	0.54	3.665	21.647	0.163035	0.24092	0.04	169.032	54.5128	6.55	0.02	0.005	5.096	96.46	9.8281	7.2783
117.978	28.5729	10.5257	9.3049	0.54	23.336	96.317	0.025	0.2612	0.068	257.624	141.695	6.66	0.128	0.0555879	12.957	57.27	21.1345	21.5936
116.363	26.7072	11.5885	17.0021	0.541	10.561	17.975	0.0635907	0.1759	0.01	214.065	117.567	6.73	0.324	0.143336	10.462	132.63	29.6289	10.5836
115.353	27.7747	3.071	1.9836	0.541	10.349	1.531	0.025	0.6458	0.248	85.7895	49.7405	6.47	0.152	0.0202799	12.007	42.2	16.269	2.2139
115.842	29.6808	3.7443	0.3616	0.541	0.61	9.28	0.266653	0.15082	0.108	228.406	206.504	7.68	0.02	0.0264951	2.091	247.18	52.4486	18.3439
116.536	29.89	13.3705	2.1158	0.541	7.162	39.076	0.0520524	0.58554	0.18	408.732	345.653	7.41	0.828	0.005	21.181	373.78	78.8589	36.1201
114.145	25.5933	4.5836	1.198	0.542	4.244	9.757	0.025	0	0.01	89.6666	33.9473	7.83	0.02	0.005	2.827	36.17	6.3164	4.4136
114.968	27.1122	15.332	3.6424	0.542	32.282	22.465	0.14402	0.60967	0.01	132.511	58.5059	4.82	0.136	0.280032	21.966	17.78	6.9418	9.9981
118.167	28.5973	14.23	1.5387	0.543	9.526	42.835	0.08536	1.34902	0.164	325.247	248.524	7.79	0.168	0.0549228	9.799	244.17	83.1299	9.9439
116.488	26.4459	4.2925	5.8206	0.544	3.145	13.856	0.720358	0.27408	0.204	153.083	106.63	7.48	0.24	0.022466	11.913	96.46	33.218	5.7516
114.729	24.8639	13.6642	1.5812	0.544	27.486	57.414	0.025	0.57107	0.144	306.109	208.88	7.45	0.144	0.0758496	21.574	180.86	67.2955	9.9181
115.798	29.3278	10.1437	2.608	0.544	0.682	16.663	0.0998215	0.3992	0.26	172.256	127.708	7.86	0.044	0.0447446	5.931	156.75	28.7591	13.5737
117.977	28.4247	2.8071	2.5831	0.544	2.181	6.61	0.0535645	3.4552	0.068	82.4137	45.672	7.39	0.532	0.0253461	10.444	39.19	12.6479	3.4216
118.024	28.4922	2.5839	1.6362	0.544	2.745	1.791	0.025	0.22581	0.01	147.341	111.765	7.52	0.256	0.032417	5.365	141.68	38.2065	3.9736
113.761	27.6478	24.8591	4.7437	0.545	47.259	6.67	0.0950288	0.3148	0.01	165.343	59.9867	6.12	0.112	0.165742	36.777	18.09	16.84	4.3558
116.298	27.9278	13.3736	6.9384	0.546	14.21	41.615	0.025	0.13276	0.1	131.379	46.6722	7.03	0.08	0.0466407	16.714	6.03	8.5182	6.1686
113.732	27.65	3.4254	1.1262	0.546	5.647	30.651	0.025	0.20187	0.01	282.127	236.553	7.83	0.112	0.005	6.28	259.24	78.9054	9.5983
113.737	27.6372	25.2301	6.9017	0.546	15.807	61.553	0.025	0.25161	0.076	339.583	218.849	7.32	0.144	0.005	24.931	229.09	52.8524	21.0967
118.011	28.4792	5.6585	0.9158	0.546	1.979	23.812	0.025	0.96575	0.2	156.173	81.7476	7.52	0.02	0.0122338	4.545	84.4	21.0981	7.0582
117.647	28.2808	17.1379	8.3595	0.546	4.166	31.782	0.0107959	0.10594	0.01	269.963	197.757	7.64	0.26	0.214967	13.881	226.08	58.501	12.5497
117.588	28.4274	8.5122	7.7086	0.546	1.343	13.727	0.202573	1.28533	0.164	126.429	94.648	7.21	1.408	0.0803455	4.308	120.58	14.4471	14.2238
116.908	27.2655	5.2719	0.7988	0.547	5.64	0.245	0.025	0.25449	0.104	81.2961	24.4491	6.02	1.72	0.198668	6.429	24.12	8.2672	0.9242
117.346	29.1725	13.1216	10.8678	0.547	18.523	44.614	0.025	0.10274	0.088	346.087	248.406	7.56	0.34	0.442225	15.538	283.35	53.2538	28.0308
116.606	27.4767	18.6348	1.3434	0.548	5.303	8.226	0.025	0	0.188	348.51	231.496	7.35	0.14	0.005	24.758	277.32	67.0385	15.5659
115.632	24.7985	5.5334	4.0242	0.549	0.489	0.814	0.111542	0.15979	0.108	146.354	57.6	6.65	2.592	0.019431	1.584	90.43	18.51	2.7636
115.04	26.8916	12.9259	9.9072	0.549	2.921	19.125	1.38679	0.28356	0.276	232.907	171.805	7.08	0.208	0.0467174	21.455	174.83	49.195	11.8904
115.717	29.6033	3.268	0.7012	0.549	3.297	21.197	0.025	0.19024	0.08	184.648	147.614	8.31	0.02	0.0177975	1.911	159.76	45.2717	8.395
115.894	29.185	29.9487	1.5289	0.549	2.062	6.893	0.624192	0.32719	0.152	238.665	163.301	7.25	0.044	0.005	19.319	223.06	33.5095	19.3364
117.696	28.3175	33.4031	3.0402	0.55	31.501	71.847	0.0764104	2.80886	0.424	313.875	167.189	6.77	0.12	0.0963371	41.569	117.56	28.7577	23.162
114.301	25.707	6.2017	14.4996	0.551	2.201	76.31	1.68104	1.78182	2.38	276.962	184.017	8.14	1.488	0.0162902	9.683	168.81	52.1786	13.0468
114.304	25.6872	12.565	4.5759	0.552	0.538	21.535	0.0801371	0.02816	0.088	204.343	135.11	7.58	0.056	0.005	11.628	174.83	43.636	6.3505
115.38	25.0457	1.2432	3.1457	0.553	2.506	7.876	0.025	0.91803	0.072	63.5582	29.1781	6.57	0.636	0.0315716	2.665	27.13	8.1593	2.138
115.014	27.1181	12.3296	2.7088	0.553	3.463	29.26	0.025	0.20212	0.064	230.404	167.573	7.29	0.24	0.655503	16.039	168.81	37.853	17.7403
115.036	27.4528	10.3185	8.4663	0.553	1.407	29.934	4.676	0.61038	8.92	184.283	113.354	6.91	0.612	0.220597	11.398	129.62	30.9678	8.7487
114.453	27.8017	11.7375	1.4435	0.553	5.206	19.017	0.242522	0.42464	0.052	195.423	144.27	6.82	0.104	0.136	17.887	132.63	46.5244	6.8234
115.954	28.6547	23.2222	3.5314	0.554	4.749	79.811	0.025	0.23362	0.32	293.759	183.573	6.68	0.02	0.005	25.705	156.75	30.2637	26.2274
115.961	28.7322	41.1041	3.7166	0.555	16.998	81.47	0.025	0.23219	0.36	354.533	205.237	6.82	0.02	0.005	40.236	156.75	32.0081	30.4306
116.838	28.2169	4.2244	2.4519	0.555	5.189	10.201	0.025	0	0.01	158.552	113.576	6.32	0.052	0.019589	16.906	106.69	36.9456	5.1779
118.151	28.4304	9.0843	4.5644	0.556	6.263	20.501	0.025	0.46231	0.264	156.387	99.0842	7.25	0.12	0.0023065	11.135	90.43	28.3361	6.8793
114.98	28.446	1.1544	2.4734	0.556	5.353	6.639	0.025	1.6075	0.024	236.749	226.631	7.21	0.104	0.0297661	7.645	229.09	65.7375	15.1736
114.987	27.5842	4.8874	2.6149	0.557	0.866	6.973	0.0179837	0.34099	0.264	119.814	56.3572	6.65	0.168	0.0303462	2.711	63.3	16.6994	3.5597
115.999	29.7239	21.0061	1.8356	0.557	7.804	30.407	0.025	0.14284	0.036	239.028	161.459	7.1	0.02	0.005	28.814	156.75	35.8744	17.4552
114.12	25.4805	4.1206	2.385	0.558	0.904	9.371	1.0524	1.90985	1.28	117.764	77.0529	7.26	1.952	0.005	2.087	84.4	16.6126	8.638
117.27	29.1975	1.4848	2.113	0.558	2.184	8.813	0.328664	0.20763	0.01	278.434	244.067	7.96	0.224	0.005	1.737	310.48	65.7344	19.4095
115.959	29.6853	8.9583	2.5634	0.559	1.079	5.606	0.464338	1.7781	0.36	126.705	79.8933	7.52	0.128	0.005	6.59	108.52	21.9024	6.1202
116.07	29.0622	5.3737	4.0455	0.56	5.163	9.842	0.025	0.21296	0.08	170.412	111.309	6.49	0.02	0.0130128	16.253	114.55	36.049	5.1712
115.932	28.7344	3.0588	8.0679	0.56	0.856	3.413	2.32387	6.38157	23.2	261.505	204.577	7.24	1.184	0.0009642	2.465	295.41	37.1005	27.1825
114.641	27.8578	1.7094	0.2412	0.56	2.72	3.696	0.025	0.81422	0.01	173.547	148.873	7.54	0.16	0.0393671	2.799	180.86	49.4974	6.1383
114.536	24.7452	4.3757	1.1841	0.561	0.783	22.114	1.8806	0.73864	1.4	231.164	191.09	7.28	1.656	0.058217	5.511	220.05	41.7702	21.0758
114.772	26.6611	5.0674	8.4118	0.561	1.436	15.702	0.152468	0.22111	0.32	274.941	217.19	7.39	0.708	0.0135756	6.209	286.37	58.8548	17.0542
117.211	29.2792	14.3463	5.6907	0.561	3.036	50.505	0.311558	0.56132	0.148	327.191	242.005	7.36	0.052	0.005	12.818	265.27	68.767	17.07
115.758	25.3185	18.4984	5.3027	0.562	5.277	17.482	0.0533138	0.18949	0.01	173.498	75.8117	6.99	0.052	0.0174693	56.392	48.23	18.899	6.9502
117.183	29.0761	42.5099	11.1175	0.562	3.323	73.456	0.025	0.16597	0.14	438.545	287.586	7.38	0.176	0.202076	19.578	355.7	61.9861	32.2504
118.044	28.4064	15.5058	7.0484	0.564	5.312	24.72	0.025	0.93587	0.204	278.143	169.697	7.64	0.06	0.0285691	6.07	214.02	58.3494	5.8276
117.945	28.4389	12.7445	3.3358	0.564	2.135	63.021	0.28286	2.45696	0.12	251.977	168.47	7.34	0.492	0.0068074	12.662	144.69	49.1604	11.1017
117.349	28.3473	3.8601	4.3502	0.564	6.826	2.047	0.025	3.65612	2.428	276.814	276.063	7.75	0.16	0.248759	5.846	301.44	70.1813	24.4829
114.977	27.0936	30.7446	13.7578	0.566	4.536	121.479	0.868566	0.45376	1.384	426.393	264.479	6.98	0.092	0.020897	33.428	232.11	60.2364	27.7
117.064	28.0389	3.2527	2.0265	0.566	2.064	5.366	0.025	0	0.01	78.9106	46.6726	6.26	0.228	0.005	4.019	53.35	12.5486	3.7248
116.302	27.6703	7.8093	16.3183	0.567	1.729	5.895	0.486548	0.5802	0.252	163.086	106.239	7.63	20.564	0.425434	9.863	144.69	24.1703	11.1428
116.528	27.2096	68.4906	21.0969	0.567	9.757	4.157	2.75384	5.69596	7.14	501.822	229.583	6.83	0.672	0.178794	125.508	307.47	52.8546	23.702
115.006	27.1067	17.9113	4.5654	0.567	3.535	29.669	0.0821966	0.38126	0.01	253.604	178.743	7.38	0.256	0.005	23.53	183.88	45.3506	15.9064
116.686	29.8497	2.5851	1.0317	0.567	4.213	11.372	0.025	0.17148	0.08	299.22	269.289	7.86	0.02	0.0115118	9.698	286.37	66.2412	25.227
116.574	29.2833	20.1587	7.0522	0.567	8.459	12.352	0.25375	0.41294	0.116	296.328	157.988	7.76	0.132	0.005	23.663	198.95	35.8502	16.627
114.934	25.3954	6.9785	1.6054	0.569	5.018	12.549	0.0788408	0.03667	0.08	191.271	148.442	7.31	0.548	0.0883237	21.193	141.68	36.5808	13.8659
114.627	27.8033	27.5214	0.5705	0.569	1.594	16.388	0.025	2.08419	0.036	386.485	332.736	7.89	0.34	0.0413643	96.744	259.24	49.9902	50.4883
114.29	25.4062	16.6684	12.471	0.57	13.206	21.819	0.0549608	0.505	0.028	206.779	107.735	7.22	0.052	0.005	23.772	111.53	18.6596	14.8474
115	27.0942	21.0183	11.1492	0.57	1.413	33.129	1.97229	2.08581	1.14	298.59	193.167	6.92	0.58	0.0151519	29.551	248.95	44.1432	20.1412
113.83	27.6475	3.0993	1.0927	0.57	5.557	20.522	0.025	0.21352	0.128	268.777	223.433	7.88	0.02	0.005	5.458	265.27	76.1757	8.0676
116.284	27.7059	7.7584	8.1625	0.571	1.156	21.745	7.16148	1.75579	2.8	206.721	140.824	6.98	1.916	0.361058	12.179	156.75	36.1674	12.2667
116.461	28.1308	6.1761	17.1477	0.571	9.528	25.65	0.446226	1.44153	0.104	160.013	66.8519	6.9	0.444	0.132145	6.862	78.37	16.561	6.1921
115.377	25.1162	0.973	2.9147	0.571	2.95	5.816	0.147762	0.0373	0.036	90.4094	41.8199	6.27	0.188	0.0150226	4.685	42.2	8.2114	5.1763
118.035	28.3835	14.4261	14.8316	0.571	33.06	27.747	0.025	0.2204	0.032	251.76	138.853	7.2	0.184	0.0067941	27.09	120.58	41.3111	8.6691
115.997	29.7278	22.3304	4.5097	0.572	5.017	30.669	0.025	0.20486	0.076	263.44	180.464	7.86	0.12	0.005	36.327	168.81	46.1319	15.8505
115.935	28.5475	16.4399	2.5105	0.572	1.871	26.329	0.025	0.13288	0.32	150.246	83.6842	6.44	0.02	0.005	6.938	90.43	10.2872	14.0838
114.248	26.9468	3.0964	6.7431	0.574	1.823	33.212	0.025	0.3146	0.036	243.472	190.424	7.32	0.684	0.138007	5.965	211.01	48.5105	16.8269
114.548	27.5374	11.7579	0.8031	0.574	0.457	3.495	0.025	0.3103	0.296	119.442	64.5685	7.73	0.176	0.0609916	1.144	108.52	15.1099	6.5175
115.779	29.3161	15.6312	4.4976	0.574	0.575	30.393	0.849374	0.41028	0.2	318.764	204.139	7.58	0.16	0.005	25.538	235.12	52.2062	17.9166
115.203	25.92	24.4075	43.3335	0.575	5.535	81.707	0.025	0.65121	0.056	428.723	236.477	7.52	0.38	0.0104456	18.569	271.29	68.7166	15.7581
114.754	25.0908	5.6448	2.4324	0.576	10.956	13.95	0.025	1.64225	0.16	108.089	49.0948	5.91	0.224	0.0725201	11.293	30.14	8.4621	6.7909
114.946	27.7753	7.9372	5.8586	0.576	5.617	35.118	0.025	0.65527	0.492	199.594	143.337	6.55	0.3	0.0069847	17.788	117.56	34.7115	13.7598
116.02	29.3353	1.2443	0.4007	0.578	3.788	1.117	0.0647753	0.42702	0.124	65.9279	45.7212	8.02	0.044	0.0129455	0.886	57.27	12.4509	3.553
115.427	27.3267	16.5549	10.7731	0.58	0.53	42.336	0.615622	0.33373	0.616	363.369	258.203	7.36	0.476	0.0804776	13.192	337.61	61.2842	25.5406
114.377	25.3822	2.8184	6.587	0.582	7.036	10.1	0.025	0.34963	0.084	105.006	55.5115	7.3	0.044	0.0287149	7.465	57.27	8.0993	8.5691
113.862	27.9179	7.3084	1.7166	0.582	1.282	144.776	0.0894638	0.71828	0.152	360.555	277.43	8.28	0.02	0.005	6.261	165.79	74.2556	22.3443
118.183	28.6161	13.7935	4.7214	0.582	4.177	26.971	0.408513	1.91921	0.12	229.818	153.696	7.5	0.364	0.100249	12.171	180.86	45.9027	9.4894
117.372	28.5404	5.4769	2.3773	0.582	3.318	11.118	19.9281	1.58371	0.432	156.239	84.6846	7.33	0.104	0.0122553	11.949	144.69	21.5086	7.5225
114.909	27.9561	10.6218	12.1233	0.583	4.55	32.491	0.025	1.99778	0.052	191.556	133.287	11.09	0.284	1.02839	14.528	ND	49.5165	2.3419
116.107	25.9796	22.8527	1.6039	0.585	3.718	96.303	0.0598252	0.58027	0.148	335.186	195.108	7.84	0.68	0.173779	9.739	186.89	56.0609	13.3861
115.382	28.2167	4.4282	0.4778	0.586	2.273	5.98	0.025	1.0012	0.24	216.153	187.466	7.79	0.212	0.471664	4.455	229.09	60.0475	9.1129
116.368	26.9511	27.9914	33.4111	0.587	3.26	29.587	0.0264222	0.74293	0.652	357.925	214.193	6.85	0.248	0.021336	42.386	235.12	59.0953	16.1806
115.388	27.7569	20.7805	15.3606	0.588	3.091	33.016	0.236045	0.23146	0.28	274.411	130.779	6.76	0.396	0.128414	24.509	135.65	30.2013	13.445
115.9	28.6675	40.5446	13.6389	0.588	10.933	48.743	0.025	2.56249	1.76	388.691	205.318	6.92	0.02	0.005	38.487	277.32	52.1589	18.2315
114.123	27.7058	8.9621	2.9065	0.588	6.335	42.086	0.09376	1.11908	0.168	259.346	193.933	7.23	0.02	0.0530169	12.95	186.89	60.3698	10.4879
115.375	28.3086	0.5588	0.2122	0.589	1.956	3.361	0.025	0	0.068	174.083	151.625	7.54	0.204	0.0126724	1.918	186.89	51.4344	5.6321
116.02	26.4714	13.1304	15.1788	0.591	1.806	9.165	2.39797	0.47717	0.98	249.738	146.475	7.79	0.984	0.0228656	18.186	186.89	31.6733	16.3639
113.797	27.8737	35.2249	21.7293	0.591	3.131	57.381	0.458003	0	8.724	696.194	532.775	7.26	0.052	0.024952	59.699	639.05	98.6684	69.5483
114.927	25.8258	21.1392	10.7634	0.592	6.829	26.568	0.025	0.23541	0.068	133.339	32.4548	7.16	0.144	0.005	31.615	6.03	5.0912	4.7941
115.922	26.2849	2.6638	3.4429	0.592	6.075	17.496	0.442898	0.75981	0.072	318.903	279.679	7.46	0.208	0.479718	3.608	352.68	59.9759	31.5492
115.682	27.5337	18.0262	3.1924	0.593	0.545	5.916	0.0812446	1.42242	0.292	147.577	82.3097	7.7	3.828	0.368205	22.303	120.58	21.2175	7.1223
116.506	28.7328	24.2036	2.3974	0.594	0.52	12.266	2.23674	8.57044	1.504	205.138	100.501	7.21	0.504	0.005	23.032	147.71	20.548	11.9458
117.923	28.4544	10.4156	5.4659	0.595	1.405	45.678	0.140072	1.30021	0.132	205.64	134.927	7.03	0.232	0.0064795	8.84	126.6	37.337	10.1255
116.511	29.8228	27.5481	0.7873	0.597	0.748	9.604	1.40534	0.16535	0.488	277.986	179.726	7.75	0.02	0.005	24.854	244.17	40.8675	18.8635
117.768	28.227	4.8199	3.5011	0.597	0.932	27.04	0.268454	1.41034	0.164	135.003	47.3469	6.83	0.088	0.0037103	6.026	75.36	14.0257	2.9929
114.271	25.5716	5.2844	1.5772	0.598	4.838	104.519	0.025	0.62733	0.072	313.542	242.106	7.98	0.068	0.005	2.679	168.81	88.2269	5.2947
113.839	27.62	10.4913	1.6445	0.598	2.951	43.394	0.0725506	0.20476	0.148	404.378	357.136	7.65	0.02	0.005	14.828	388.86	80.6489	37.8232
115.943	25.7824	5.6615	1.6703	0.607	23.561	3.33	0.025	0.29482	0.1	92.2612	50.8462	6.31	0.1	0.0536607	10.858	24.12	10.5328	5.9606
114.365	27.8061	3.584	1.3335	0.607	1.27	19.244	0.025	1.92813	0.072	133.135	98.476	8.6	0.12	0.0261844	5.232	96.46	24.243	9.2135
116.886	28.3542	4.8741	1.1137	0.607	0.547	9.561	0.513799	2.42531	0.18	259.472	217.578	6.8	1.704	0.0267184	11.33	254.88	74.0977	7.9057
116.602	28.2211	4.9568	16.1928	0.608	18.026	22.518	1.23896	1.06668	0.064	264.988	201.035	7.04	0.228	0.034266	10.709	192.92	62.2275	11.0861
116.007	29.7236	10.6988	1.0918	0.608	0.5	4.678	0.147897	0.9122	0.16	273.585	222.023	7.85	0.12	0.005	21.207	277.32	67.641	12.9002
115.583	29.1783	2.8487	0.8844	0.608	0.71	3.666	0.025	0	0.212	58.9815	20.121	6.38	0.204	0.0167303	2.583	24.12	4.8961	1.9173
114.529	25.7995	14.582	10.8609	0.609	1.555	12.712	0.119918	0.04462	0.14	169.804	97.8241	6.93	0.02	0.0039097	13.71	126.6	16.9985	13.448
115.534	24.9273	3.0749	2.1433	0.61	0.635	13.227	1.29323	0.28812	0.104	92.3944	44.3966	6.22	0.512	0.0166358	2.677	51.24	9.73	4.8812
114.644	27.556	47.9964	38.4186	0.61	70.758	85.406	0.025	0.561	0.092	464.988	166.034	6.67	0.16	0.116111	82.053	90.43	36.8796	17.9566
114.027	26.6429	3.9419	1.7092	0.614	3.342	2.524	0.463031	0.45698	0.064	89.3612	34.615	7.1	9.516	0.0620626	2.277	42.2	11.2269	1.5982
116.279	29.5025	49.0496	0.0909	0.614	1.172	9.436	0.276806	0.48131	0.12	728.35	541.181	7.68	0.076	0.005	217.033	455.17	110.079	64.6708
118.034	28.4964	65.0848	3.6647	0.616	30.832	1.271	0.0924902	1.34624	0.644	290.594	42.3736	7.71	0.788	0.22336	34.826	150.72	4.8213	7.3664
118.043	28.3814	6.6378	3.3652	0.616	0.661	20.298	1.39643	1.51317	0.408	134.506	84.9579	7.43	0.332	0.0118119	6.897	90.43	22.2561	7.1356
117.843	28.9244	2.2102	10.9066	0.617	4.211	10.185	0.025	0.20162	0.108	221.173	161.338	7.38	0.12	0.033579	4.928	204.98	51.2819	8.0832
114.972	27.1169	18.7007	11.3453	0.619	24.843	134.589	1.1233	1.15	3.24	449.729	281.812	6.72	0.02	0.0124591	34.287	183.75	90.58	13.51
115.319	25.2133	5.13	2.9116	0.621	0.823	6.441	0.595443	1.87784	0.74	174.796	120.86	7.43	0.144	0.0061491	6.862	150.72	23.1937	15.2853
115.357	25.1104	5.7591	1.7684	0.622	9.728	4.228	0.025	0	0.032	108.574	41.4165	6.35	0.068	0.0094203	6.622	42.2	8.3655	4.9849
117.906	28.4708	11.7078	4.6296	0.624	1.489	43.962	0.025	0.8808	0.052	298.1	210.142	7.7	0.184	0.0122856	13.168	235.12	71.2173	7.8466
113.739	27.6308	24.8454	6.0058	0.625	9.54	42.786	0.025	0.41929	1.596	330.074	219.612	7.42	0.144	0.005	30.846	241.15	65.8506	13.4004
117.723	28.2026	7.5046	11.3968	0.627	14.47	57.782	0.025	3.02416	0.192	214.962	92.0479	7.12	0.02	0.0054334	10.067	96.46	25.1732	7.0885
114.94	27.8008	18.2054	6.573	0.629	1.591	17.137	1.90594	0.64029	1.984	311.158	217.777	7	2.916	0.0072946	34.877	262.25	57.5559	17.9845
114.698	29.1851	27.0714	0.6204	0.63	0.75	20.242	2.48129	0	0.604	235.054	130.442	7.48	0.02	0.0167016	36.173	156.75	26.8062	15.4217
116.017	28.7078	65.6015	8.2862	0.63	3.857	98.884	0.500943	1.07902	0.8	485.599	263.2	6.48	0.22	0.0487938	55.724	277.32	60.0418	27.5075
114.528	26.3124	11.7992	1.6978	0.631	0.509	12.044	2.20312	0.46212	1.488	221.839	163.186	6.88	2.572	0.0474943	16.309	192.92	33.9955	19.0138
114.442	28.1352	12.3765	24.1596	0.631	8.633	38.175	0.223471	0.15252	0.468	366.733	259.708	7.31	0.12	0.0258511	13.687	313.5	63.9632	24.2817
115.066	25.6902	9.706	4.5629	0.634	2.419	17.416	3.19445	0.05846	0.74	142.445	68.9976	6.79	0.12	0.034645	11.494	90.43	13.2779	8.7039
115.119	27.6523	15.3363	4.0022	0.64	2.964	10.642	0.096393	1.37063	0.432	198.994	111.854	6.82	0.308	0.11529	18.997	120.58	30.6309	8.5888
118.266	28.7471	9.6052	5.6966	0.641	1.7	9.337	0.0628011	2.08898	0.224	243.527	195.419	7.82	0.332	0.128495	24.012	201.96	59.9856	11.0818
114.257	25.6659	1.8511	0.5852	0.644	1.475	13.723	0.025	0.16992	0.168	205.768	187.003	8.02	0.02	0.005	1.956	204.98	52.6702	13.474
117.465	28.4411	7.9593	1.2001	0.644	1.426	12.078	2.75736	1.60545	0.28	246.475	196.787	7.33	0.192	0.0350703	19.012	217.04	47.1337	19.2069
114.451	28.1235	89.4991	10.9814	0.645	1.395	149.35	0.184797	1.78145	0.388	838.498	477.089	7.29	0.136	0.0341765	299.255	174.83	107.578	50.6232
115.311	26.1859	19.0035	12.3457	0.648	4.871	15.44	0.351275	0.69912	0.328	337.907	237.502	7.77	0.372	0.0176433	40.728	271.29	66.2362	17.511
116.463	26.8787	2.9689	0.9446	0.65	0.709	1.351	0.025	0	0.036	77.2806	28.4598	6.49	0.068	0.019226	1.255	39.19	8.4444	1.7907
114.801	24.9143	10.7786	1.5874	0.651	4.883	18.335	0.0702283	0.58956	0.01	248.445	203.965	7.19	0.42	0.081828	15.191	204.98	58.8179	13.8651
114.357	27.7758	8.797	3.0747	0.651	0.407	15.454	0.672077	2.18077	0.744	297.686	269.771	7.56	0.128	0.490565	9.713	289.38	63.9085	26.7586
115.891	28.6772	43.5826	25.4521	0.652	1.215	5.8	1.06941	4.20786	13.1	529.568	294.719	7.24	0.676	0.0028736	50.956	473.26	93.9453	14.6035
116.659	28.9844	18.9397	10.2858	0.652	3.326	18.551	1.24197	1.2371	0.464	320.292	187.466	7.44	0.204	0.0137341	15.016	253.21	60.0074	9.1373
115.34	25.2086	3.467	4.351	0.655	10.396	4.704	0.025	0.15858	0.036	120.478	58.6143	7.18	0.48	0.0029421	2.286	63.3	8.4835	9.0896
114.528	24.7441	10.8004	8.2756	0.656	2.817	19.009	0.122507	0.86241	0.052	208.237	137.741	7.02	0.16	0.0290413	13.293	144.69	43.6317	6.9918
113.734	27.6303	2.816	3.012	0.657	3.059	13.937	0.025	0.28355	0.01	140.8	116.664	7.72	0.144	0.005	7.248	108.52	30.1813	10.0294
113.915	27.7206	3.9698	1.9654	0.659	0.699	154.685	0.108701	1.1805	0.2	556.455	487.379	7.45	0.192	0.0892987	11.573	403.93	122.798	43.8934
114.94	27.8144	7.504	1.0601	0.659	2.612	38.243	0.245613	0.53311	0.076	297	232.176	7.17	0.24	0.023346	15.19	253.21	65.8784	16.4347
115.947	28.68	33.5769	2.878	0.67	2.649	54.799	0.0736383	1.17436	0.18	278.626	139.457	7.11	0.02	0.001869	28.508	144.69	22.1592	20.4287
117.836	28.7069	4.0055	2.8116	0.672	0.491	21.352	0.101886	0.78048	0.28	167.519	126.992	7.34	0.316	0.005	3.376	138.66	38.6009	7.4322
114.119	26.7272	8.5442	12.2658	0.674	0.571	2.574	0.866567	2.6459	0.12	190.887	108.312	7.21	5.78	0.0415447	8.123	162.78	19.6687	14.3758
117.955	28.4303	22.5213	19.4261	0.674	1.089	77.561	1.42712	0.08334	1.168	448.797	296.155	7.62	0.484	0.018461	19.367	349.67	79.0231	24.0005
115.015	24.762	1.1782	1.4599	0.678	0.838	0.763	0.025	0.25599	0.068	84.1879	34.7665	6.94	0.348	0.0213129	0.621	39.19	10.4518	2.105
117.917	28.4686	37.1847	48.9	0.679	5.22	233.512	0.025	1.23668	0.18	625.486	328.111	7.46	0.292	0.0069634	36.352	241.15	93.9752	22.6943
114.935	25.8728	18.8853	22.8024	0.683	2.655	36.581	0.574921	0.77525	3.12	340.514	198.41	6.9	1.472	0.578885	24.173	253.21	47.3658	19.4604
115.853	26.6955	5.6259	3.9482	0.683	1.519	6.201	2.63257	1.53285	1.856	191.283	130.235	6.78	1.316	0.0029201	13.134	156.75	35.195	10.2849
113.847	27.6347	22.7593	7.6436	0.683	24.636	44.852	0.025	3.95245	0.164	295.47	161.957	7.87	0.068	0.026124	38.114	147.71	46.0903	11.3816
115.721	25.0671	18.2394	12.253	0.687	10.637	24.842	0.223833	6.13131	1.808	295.774	171.682	7.34	0.06	0.0318801	27.704	198.95	47.0952	13.1339
115.63	24.9868	9.0416	2.5254	0.69	9.006	3.178	0.025	0.05045	0.032	131.095	58.46	6.53	0.144	0.0286791	9.098	63.3	9.5659	8.3958
114.948	25.8589	35.2897	22.9904	0.691	0.594	50.324	1.46163	1.47419	3.88	434.491	254.154	7.32	0.424	0.005	43.824	331.58	59.8986	25.3976
115.209	24.8971	6.5063	2.6394	0.691	0.727	6.997	0.216734	0.67522	0.22	243.942	200.921	7.95	1.496	0.0658657	6.349	223.06	49.1809	18.9695
115.918	28.6922	16.9996	2.7057	0.693	2.134	19.724	0.025	1.52792	0.132	131.787	61.1695	7.67	0.02	0.0268479	24.988	54.26	16.4101	4.9037
115.433	27.9058	6.117	2.9008	0.695	0.652	9.366	0.025	0.21229	0.676	104.3	58.9583	6.96	0.284	0.0703395	9.914	66.32	19.0573	2.7616
113.849	27.6864	11.1342	3.4294	0.696	0.628	25.372	0.025	0.29277	0.028	342.69	268.363	7.78	0.092	0.0382403	16.42	337.61	76.287	18.9108
117.896	28.4689	10.626	5.8539	0.696	4.964	23.896	0.025	0.63024	0.088	140.307	76.4823	7.37	0.2	0.0585391	16.611	66.32	24.3867	3.7855
116.905	27.2923	21.5549	19.1113	0.697	5.513	16.472	0.025	0.33114	0.684	281.274	138.784	6.85	0.392	0.182384	27.659	180.86	30.7023	15.0852
115.142	24.7091	24.1856	14.9852	0.698	3.939	27.329	0.025	1.57959	0.248	363.825	235.284	7.21	0.644	0.0366751	38.93	277.32	70.3844	14.4571
114.98	27.0797	16.7033	10.9746	0.704	4.773	113.077	0.025	0.18949	0.072	341.084	223.679	6.89	0.06	0.0552114	15.33	177.85	48.5166	24.8987
117.878	28.4622	8.3068	4.993	0.705	4.916	24.715	0.025	0.32644	0.032	145.454	84.5007	7.31	0.02	0.0290352	16.316	72.35	27.3479	3.9371
114.791	24.9301	28.6826	26.7923	0.71	8.262	43.084	1.3015	1.27728	0.404	457.568	280.397	7.26	0.176	0.0138248	47.806	355.7	75.662	22.2121
114.956	27.0833	8.0189	20.0053	0.712	10.959	51.853	0.025	0.77365	0.01	325.37	235.48	7.96	0.06	0.005	7.859	254.88	61.5572	19.8571
115.141	25.493	15.5615	0.8298	0.716	0.496	3.261	0.214681	1.35824	0.08	277.188	210.174	7.69	0.112	0.0046427	2.348	289.38	60.9177	14.0996
117.733	28.2113	9.1632	7.6469	0.716	9.394	54.154	0.025	1.40644	0.2	298.038	173.585	7.9	0.096	0.0401498	9.428	207.99	58.6135	6.6118
114.597	27.9566	1.9772	11.7344	0.717	3.133	66.857	0.313734	0.79757	0.06	303.54	225.89	6.61	0.02	0.0232547	2.76	211.01	58.3819	19.4536
115.954	28.6308	17.1358	2.5323	0.718	8.358	27.896	1.47041	1.19308	1.44	303.608	213.688	6.75	0.02	0.005	21.395	235.12	56.7052	17.5073
114.943	25.8378	21.0298	2.3936	0.719	4.996	42.961	0.025	0.39847	0.048	400.465	294.857	7.45	0.22	0.005	39.49	325.55	89.3059	17.4503
116.943	27.5881	5.1646	8.6065	0.726	0.801	12.716	0.889653	0.53979	0.356	150.325	85.7458	7.44	0.24	0.005	4.898	114.55	15.7287	11.2849
115.927	26.7219	5.8296	3.6438	0.726	4.342	0.995	3.79535	0.52683	2.176	105.925	35.5334	6.61	0.66	0.0032488	7.445	63.3	7.8562	3.8651
114.899	25.8253	18.5794	12.8889	0.732	0.475	83.597	1.61798	1.24403	1.54	338.696	223.004	7.77	0.208	0.005	21.437	189.91	61.3116	16.9764
114.765	25.7227	11.8011	18.4455	0.739	0.451	3.417	5.37459	0.28329	4.812	188.891	107.494	7.23	0.152	0.0200582	13.393	189.91	23.2052	12.0326
114.367	25.3952	21.6286	5.127	0.746	2.879	37.537	0.121709	3.10075	1.084	251.078	143.734	7.23	0.02	0.0116172	58.598	114.55	17.9353	24.0285
115.677	29.6928	22.4106	7.2951	0.747	18.1	67.21	0.025	0.2627	0.01	362.654	237.983	8.04	0.192	0.005	28.999	223.06	62.0968	20.1378
115.004	27.1117	15.6639	14.4534	0.751	0.912	13.366	1.30874	3.21666	1.18	226.82	124.364	6.91	0.512	0.163068	21.204	153.73	30.8079	11.5194
117.689	28.1397	14.9159	5.8687	0.761	2.482	13.762	0.0839965	2.97558	0.192	211.498	120.356	7.62	0.152	0.157021	11.554	168.81	38.6457	5.7935
114.537	27.4166	2.699	1.7485	0.762	1.4	15.002	0.025	0.25884	0.372	187.58	167.871	7.68	0.516	0.232613	14.01	162.78	43.6112	14.3211
115.882	26.7109	2.4147	3.1337	0.765	2.142	1.102	0.025	0.07691	0.048	99.4225	46.888	6.71	0.368	0.0221008	3.067	63.3	12.2295	3.9706
115.12	25.9583	12.6803	5.9222	0.769	0.829	19.825	3.66224	0.11492	3.24	301.914	224.41	7.47	1.084	0.0039614	11.156	301.44	61.2082	17.3805
115.141	28.1275	18.1879	4.1162	0.773	30.174	56.617	0.134925	0.47651	0.116	428.863	308.009	7.59	0.12	0.0451916	43.911	289.38	83.646	24.076
114.669	27.6774	1.9344	1.1295	0.798	3.117	15.606	0.025	0.41712	0.036	306.647	276.603	7.55	0.12	0.0081235	12.667	301.44	89.4268	12.9442
115.352	26.3526	13.6652	7.4331	0.804	0.758	26.741	1.5793	4.61147	1.472	299.89	202.434	7.86	0.972	0.0090443	16.095	265.27	55.0974	15.7494
118.187	28.4376	18.1085	18.3253	0.817	0.669	29.283	0.780438	2.43031	0.12	253.83	102.358	7.82	0.716	0.140079	16.943	132.63	26.0522	9.0591
115.612	25.8258	10.6088	7.089	0.823	6.155	67.259	0.0591006	1.10378	0.036	198.982	112.394	6.98	0.224	0.0085322	12.287	72.35	25.0945	12.0769
114.721	27.8609	10.7638	26.4917	0.827	1.198	36.104	0.025	0.9612	0.056	332.453	211.654	7.16	0.02	0.008503	9.804	280.34	68.8376	9.6567
115.485	24.8025	3.2907	2.2522	0.837	4.7	1.573	0.0353359	0	0.044	145.651	61.7504	7.12	0.428	0.0179289	4.899	78.37	12.485	7.4248
115.609	25.8204	16.0849	41.9034	0.843	0.671	73.143	1.76542	4.61177	7.432	350.815	172.165	6.76	1.228	0.0059065	19.778	165.79	50.9512	10.9131
116.956	27.2548	7.1306	4.097	0.848	0.707	3.207	8.94706	1.7072	2.5	150.066	72.4203	6.59	7.68	0.100598	8.186	135.65	18.1556	6.5774
114.395	26.2529	11.2924	2.1632	0.876	0.488	10.029	0.268686	0.85604	0.248	186.764	101.98	7.1	1.304	0.203827	6.273	129.62	27.1529	8.2999
115.117	25.8715	10.6192	2.4905	0.893	3.43	5.773	0.041676	1.00536	0.052	112.062	41.5186	6.76	1.132	0.0082337	8.37	60.29	13.6338	1.8152
116.291	29.4511	26.0449	0.3375	0.902	2.581	9.454	0.0894491	0.28994	0.104	220.686	132.352	7.69	0.068	0.0312102	26.889	186.89	21.0888	19.3523
115.022	27.9214	14.3535	7.7957	0.918	1.132	16.722	0.025	3.58847	0.088	230.173	163.187	7.81	0.096	0.0282749	3.6	211.01	55.7174	5.8429
113.796	27.8767	22.2602	12.7816	0.921	1.531	68.497	0.307362	3.57519	0.236	457.863	314.393	7.64	0.928	0.280423	22.318	373.78	71.429	33.0341
114.325	27.7875	9.4986	23.0747	0.953	5.229	197.665	0.025	1.18212	0.156	554.492	391.211	7.37	0.02	0.0423611	9.515	277.32	109.726	28.4665
113.897	27.6492	50.6246	3.5121	0.966	4.754	114.143	0.025	3.05879	0.064	734.677	540.394	7.84	0.02	0.005	219.774	265.27	153.048	38.4251
经度	纬度	Na+	K+	F-	NO3-	SO42-	Mn	COD	NH4+	TDS	总硬度	pH	Fe3+	Al3+	Cl-	HCO3-	Ca2+	Mg2+
			min	0.408	0.232
			max	0.966	73.891
			mean	0.549852	7.25773
			std	0.0988508	8.98516
